# Supplementary material
Source: PubMed Central journal article supplement (PMC4176438)
Supplement: supp_tpc.114.128512_tpc128512_Supplemental.pdf [file supp_tpc.114.128512_tpc128512_Supplemental.pdf]

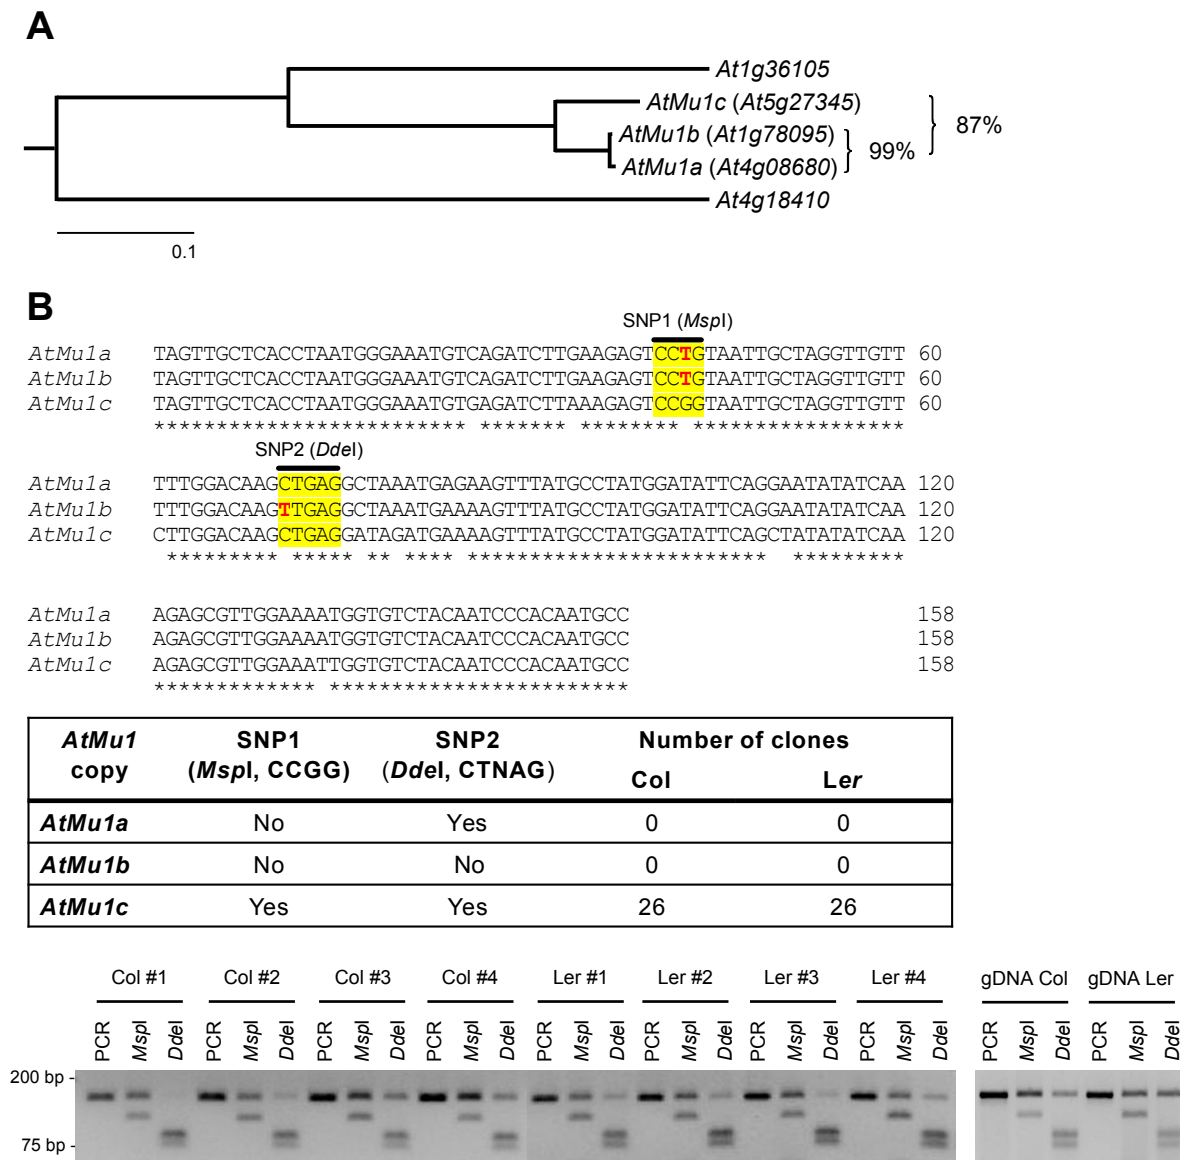

### Supplemental Figure 1: *AtMu1* phylogeny in Col and transcript discrimination assay.

(A) Phylogenetic analysis of the five *AtMu1* copies from Col. The values indicate sequence identities of the whole transposon region (including TIRs) between different copies. The scale bar represents the genetic distance. *At1g36105* and *At4g18410* were not analyzed further in this study. (B) *AtMu1* transcript discrimination assay. A 158 bp fragment of *AtMu1* was digested with *Msp*I (SNP1) or *Dde*I (SNP2), respectively. SNP1 was specific for *AtMu1c*, SNP2 was specific for *AtMu1b*. Restriction enzyme recognition sites are highlighted in yellow, SNPs disrupting recognition sites are marked in red. 26/26 clones analyzed for each Col and Ler originated from *AtMu1c*. Bottom panel: Example for the *AtMu1* transcript discrimination assay. Purified products of PCR reactions on individual subcloned fragments for four Col and four Ler clones were digested with *Msp*I or *Dde*I. Digestion by *Msp*I and *Dde*I indicates the clone originated from *AtMu1c*.

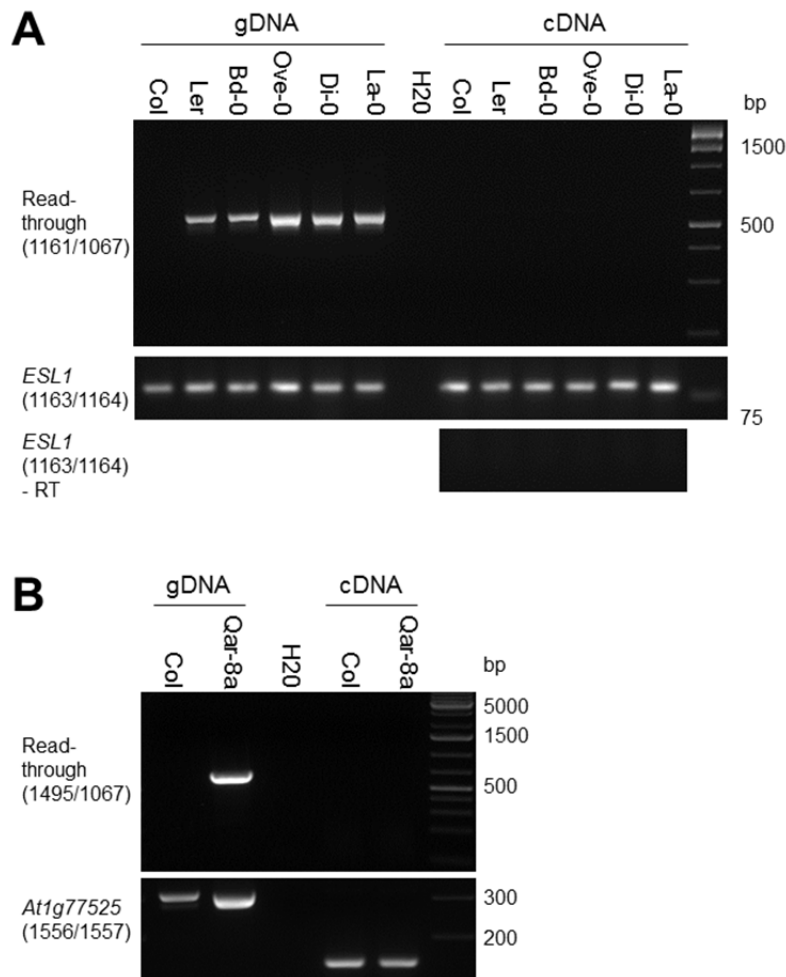

**Supplemental Figure 2: Absence of read-through transcription from the adjacent gene into *AtMu1c* inserted into annotated 3' UTRs (Chr. 1: 2.9 Mb; Chr. 1: 29.1 Mb).**

PCR was performed on genomic DNA (gDNA) and cDNA of the indicated accessions using a forward primer in (A) *ESL1* (Ler group, Chr. 1: 2.9 Mb, Primer 1161) or (B) *At1g77525* (Qar-8a, Chr. 1: 29.1 Mb, Primer 1495) and a reverse primer in the TIR of *AtMu1c* (Primer 1067). *ESL1* and *At1g77525* transcript levels were monitored as controls using the indicated primer pairs.

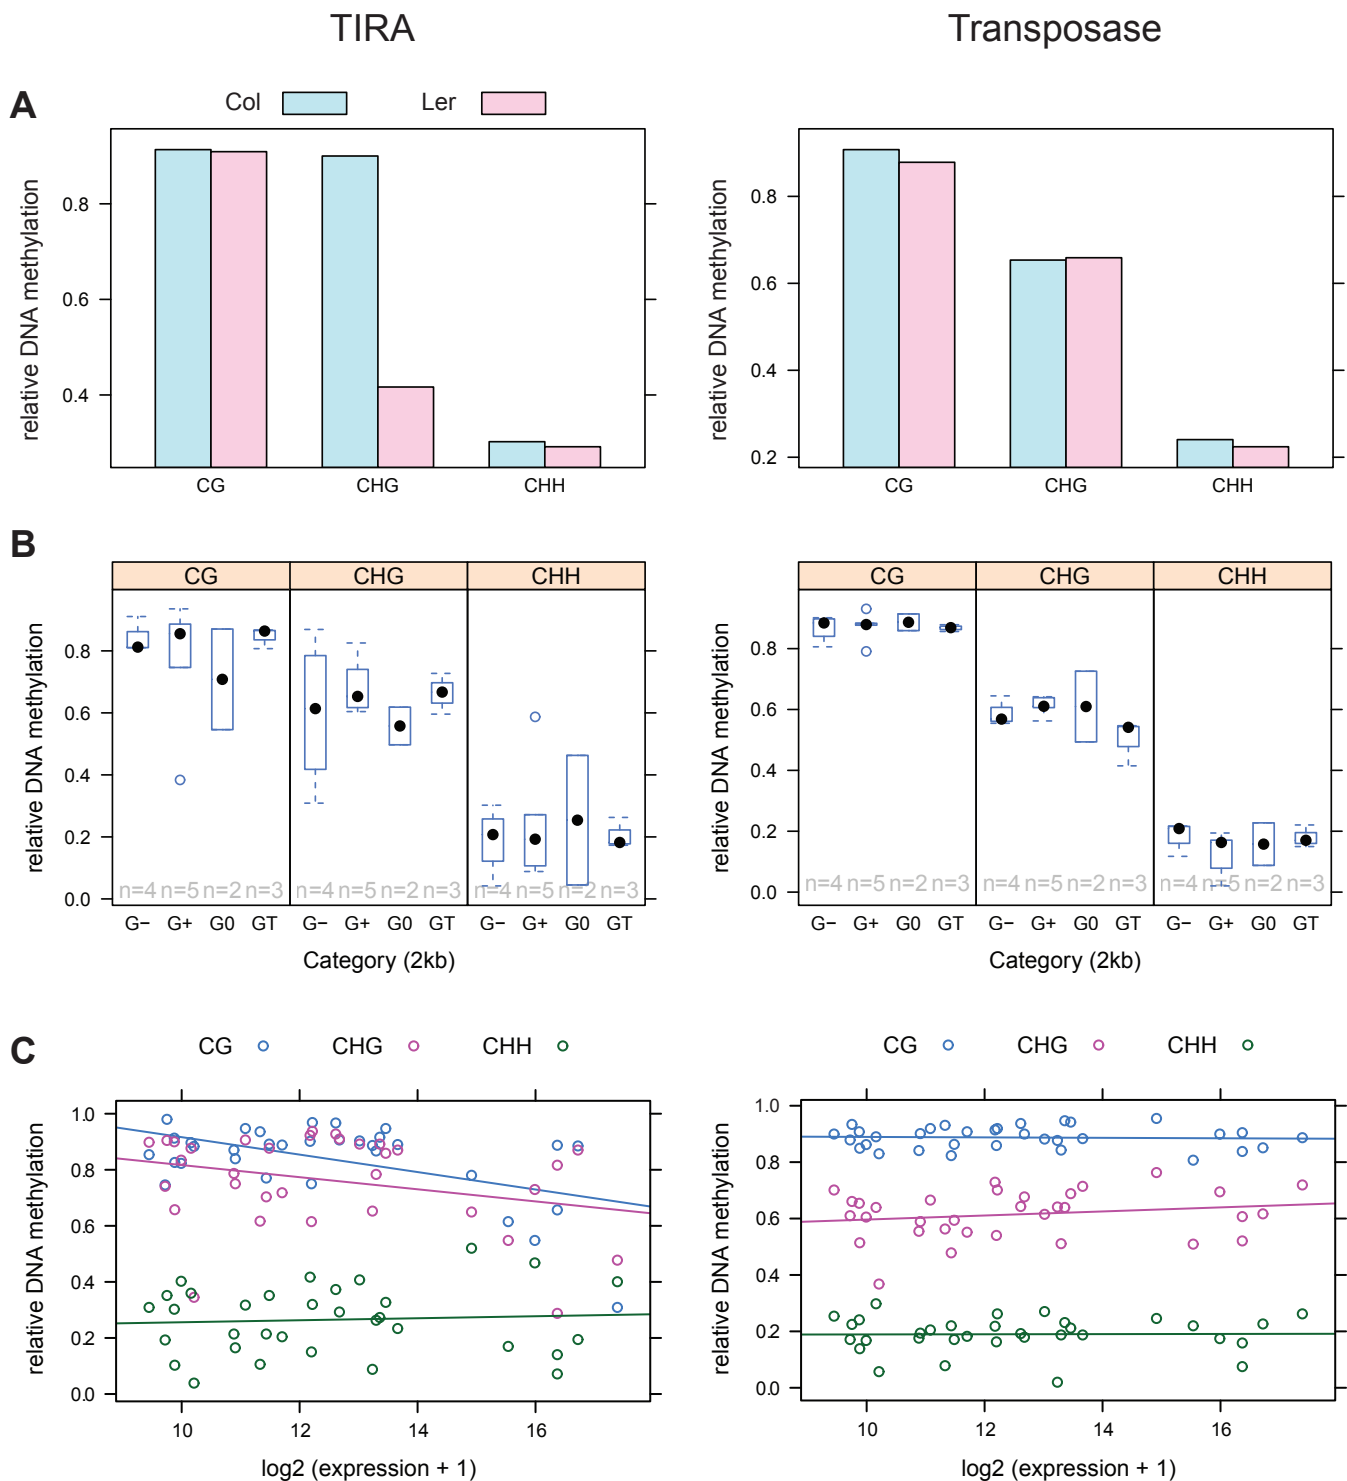

### Supplemental Figure 3: Global DNA methylation analysis of *AtMu1c* based on BS-seq methylome data.

(A) Processed BS-seq reads from Col and Ler were reanalyzed for reads mapping to *AtMu1c* TIRA or transposase. (B) *AtMu1c* DNA methylation for different categories of insertion sites and different sequence contexts (CG, CHG, CHH). Methylation data from accessions with only one *AtMu1c* insertion were used. Methylation values for accessions with the same insertion site were averaged to avoid weighing of insertion frequencies. Differences in the number of analyzed insertion sites are caused by the lack of methylome data for some accessions. See Figure 6B for corresponding expression analysis. (C) Scatterplot with regression lines of DNA methylation in different sequence contexts and *AtMu1c* expression (based on RNA-seq data) for accessions with a single *AtMu1c* copy and detectable *AtMu1c* expression.

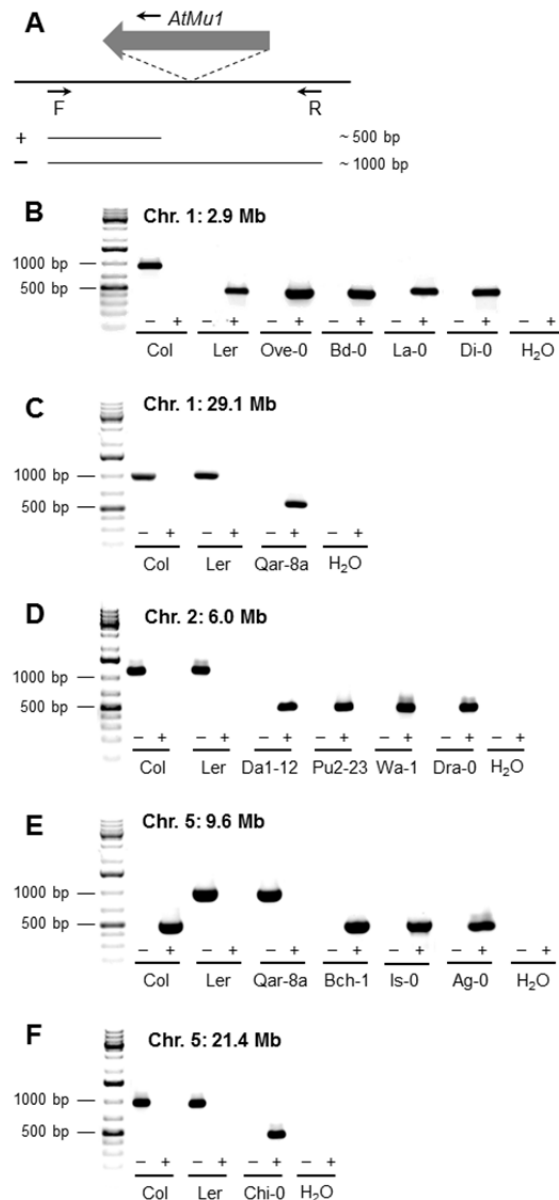

#### Supplemental Figure 4: Experimental validation of novel *AtMu1c* insertion sites.

(A) Schematic representation of validation strategy. In the absence of the insertion in the indicated accession, flanking primers F and R will give a product of ca. 1000 bp (-) and no product will be produced with F and the *AtMu1c*-specific primer 1067 (+). Conversely, if the insertion is present in the indicated accession, there will be a product only in the (+) reaction (ca. 500 bp). (B-F) Experimental validation of the *AtMu1c* insertion at Chr. 1: 2.9 Mb (B); Chr. 1:29.1 Mb (C); Chr. 2: 6.0 Mb (D); Chr. 5: 9.6 Mb (E); Chr. 5: 21.4 Mb (F).

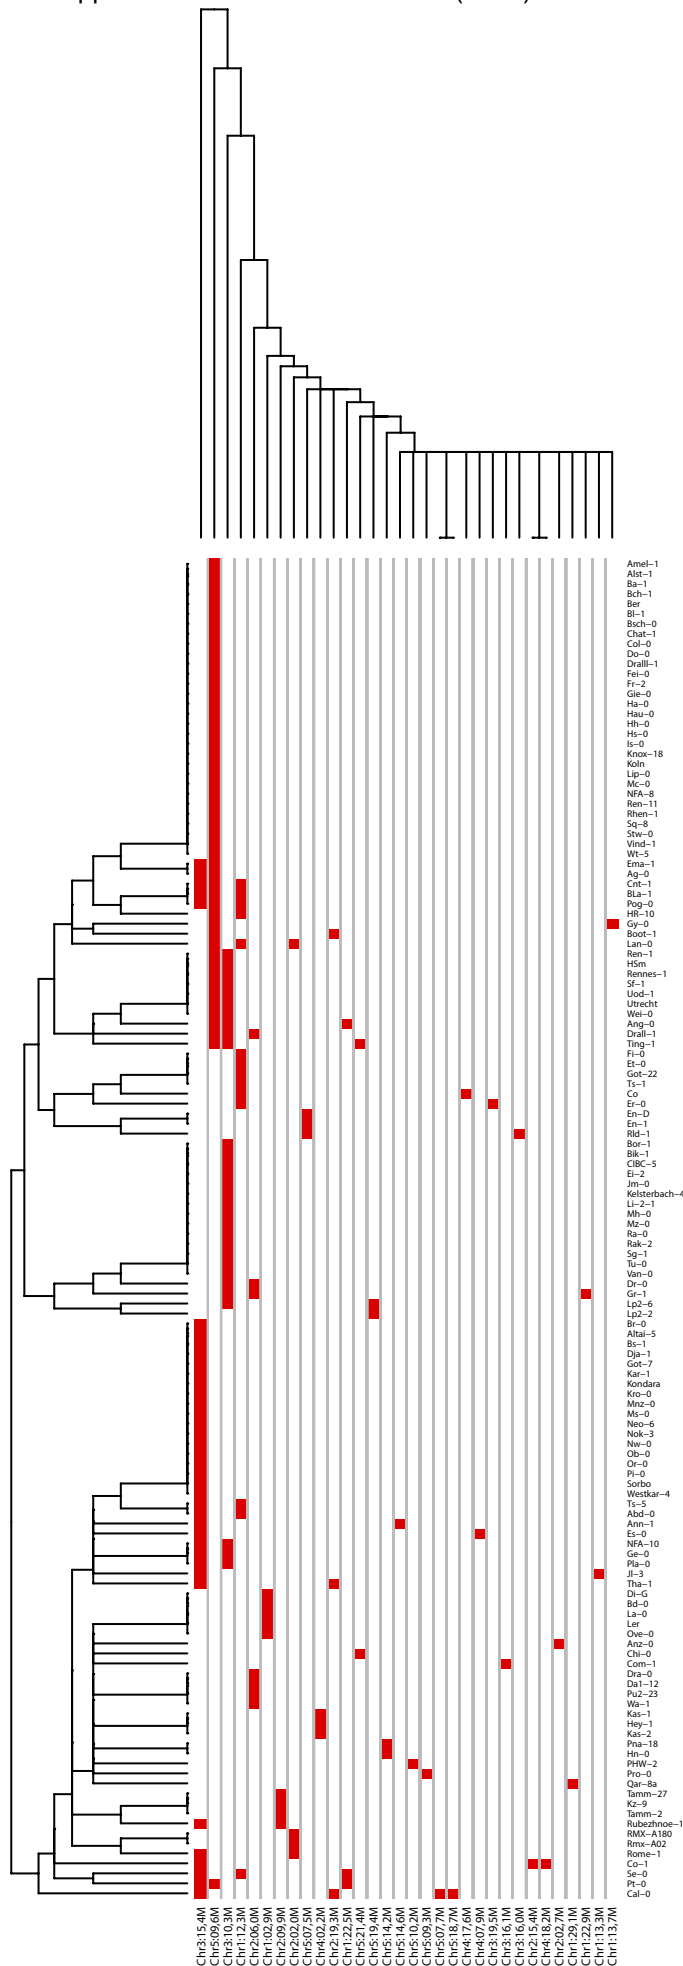

**Supplemental Figure 5: Mosaic table of *AtMu1c* insertion sites in accessions.** Binary heat map representing presence of insertion sites (red) across analyzed accessions with at least one copy of *AtMu1c*. Accessions were clustered according to their *AtMu1c* insertion sites.

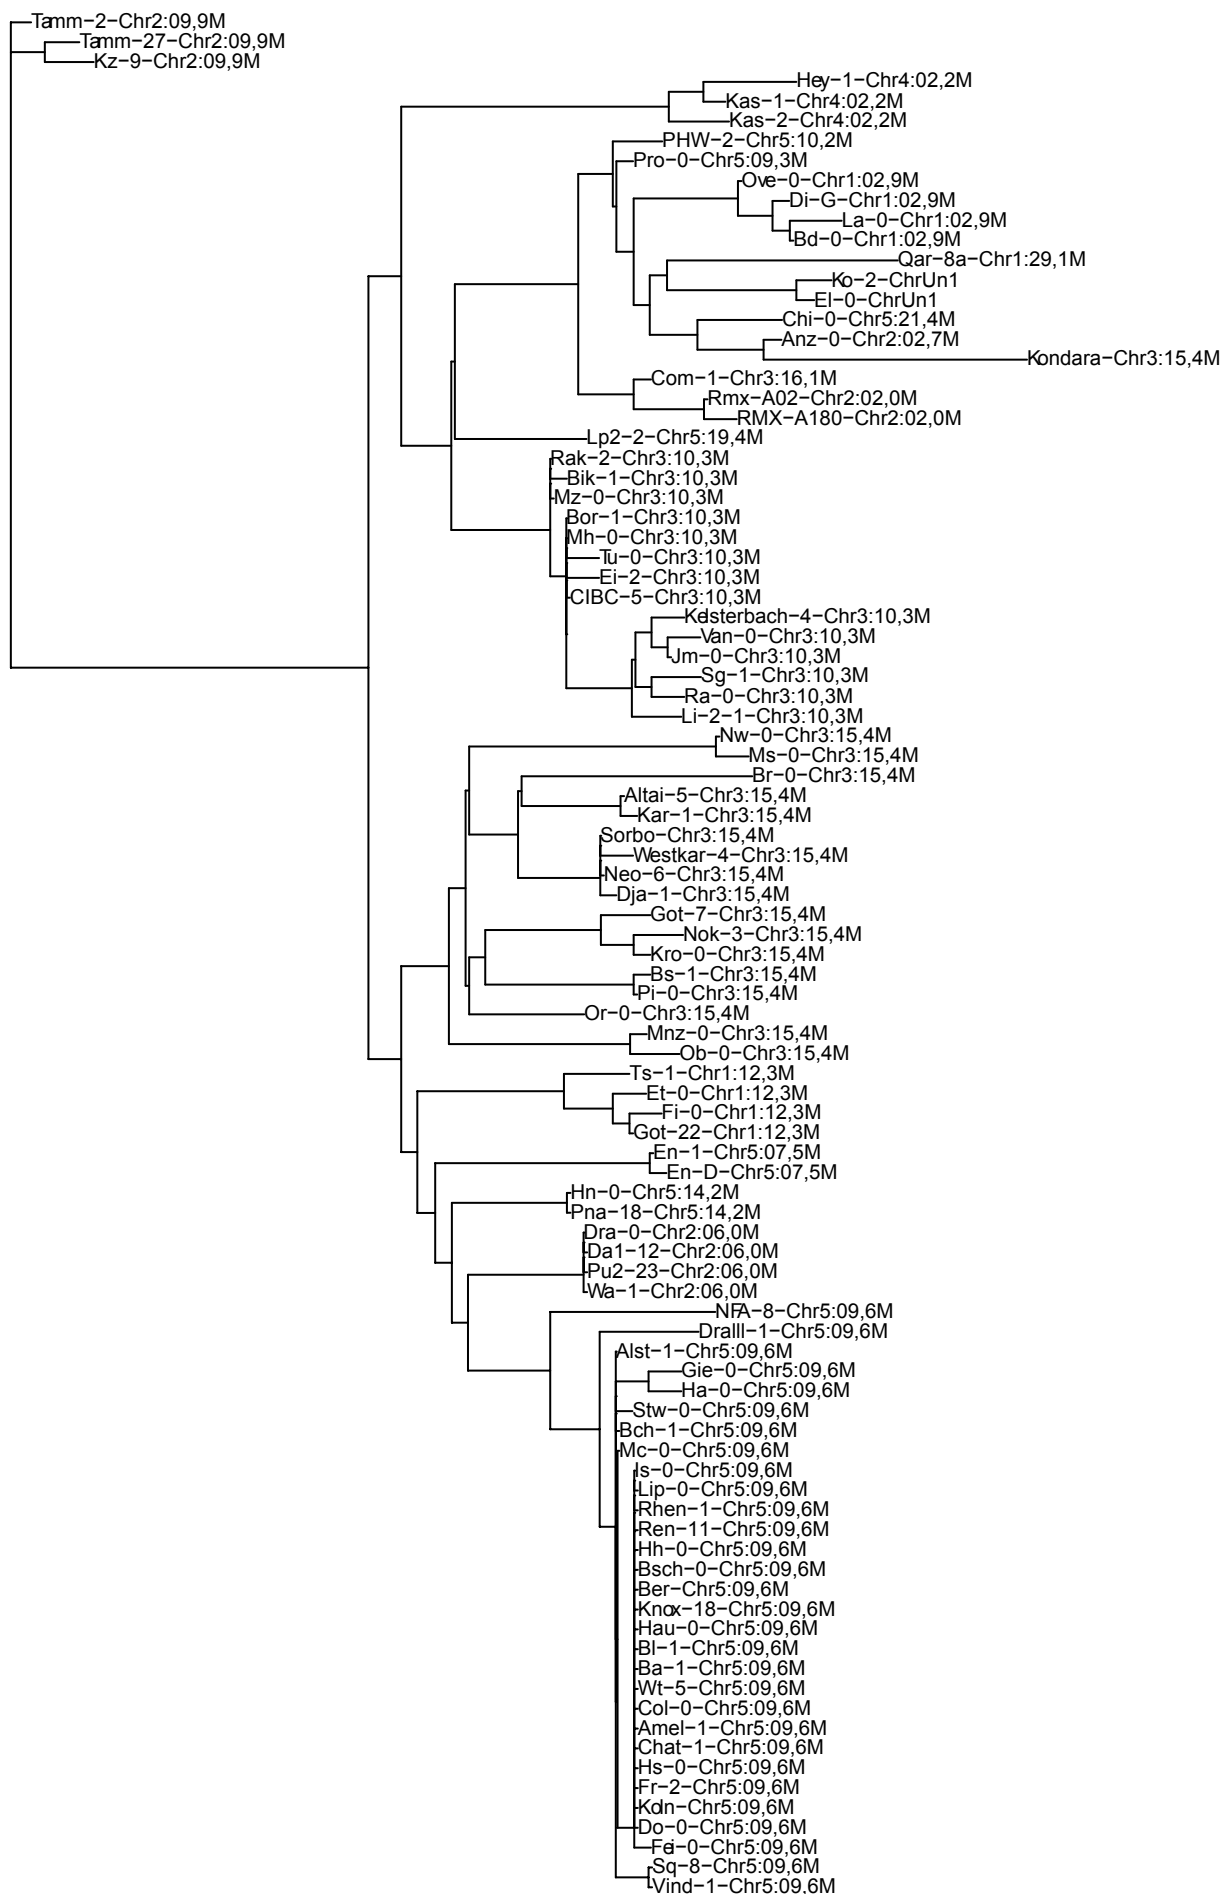

**Supplemental Figure 6: Phylogenetic clustering of *AtMu1c* from accessions with single *AtMu1c* copies indicates clustering of accessions with insertion position.** The phylogenetic tree is based on *AtMu1c* consensus sequences (including TIRs and transposase) from accessions with a single *AtMu1c* insertion. Accession names and insertion sites are indicated.

**Supplemental Table 1:** Comparison of *AtMu1* TIR sequences.

|               | TIR length (bp)        | Number of SNPs between Col TIRA und TIRB (percent identity)                              | Identity between TIRs of indicated <i>AtMu1</i> copies |
|---------------|------------------------|------------------------------------------------------------------------------------------|--------------------------------------------------------|
| <i>AtMu1a</i> | TIRA: 296<br>TIRB: 296 | 7 (97.64%)                                                                               | TIRA (1a/1c): 68%<br>TIRB (1a/1c): 72%                 |
| <i>AtMu1b</i> | TIRA: 296<br>TIRB: 296 | 11 (96.28%)                                                                              | TIRA (1b/1a): 96%<br>TIRB (1b/1a): 97%                 |
| <i>AtMu1c</i> | TIRA: 295<br>TIRB: 286 | 17 (94.57%) and 9 bp deletion (91.19%)<br>Ler:<br>18 (93.90%) and 9 bp deletion (90.85%) | TIRA (1b/1c): 67%<br>TIRB (1b/1c): 71%                 |

**Supplemental Table 2: Details of bisulfite sequencing *AtMu1c* (cf. Figure 4B).** H is A, C or T; N is any nucleotide.

|                                      |                 | CG    | CHG   | CHH   | number of clones analyzed |
|--------------------------------------|-----------------|-------|-------|-------|---------------------------|
| number of sites in sequence analyzed |                 | 4     | 7     | 67    |                           |
| number of sites analyzed             | NIL9.9.15 (Col) | 92    | 161   | 1541  | 23                        |
|                                      | NIL9.9.3 (Ler)  | 92    | 161   | 1541  | 23                        |
| proportion of methylated C           | NIL9.9.15 (Col) | 0.337 | 0.130 | 0.031 |                           |
|                                      | NIL9.9.3 (Ler)  | 0.370 | 0.062 | 0.002 |                           |

**Supplemental Table 3:** List of primers used in this study.

| Target                          | Primer                                                                         | Sequence (5' → 3')                                                       | Experiment                                  | Comment                              |
|---------------------------------|--------------------------------------------------------------------------------|--------------------------------------------------------------------------|---------------------------------------------|--------------------------------------|
| ibid5                           | 188/ibid5 F<br>189/ibid5 R                                                     | AATAAAGCAAGAAAGCAAGTCTT<br>TCCATCAAATCTCATGTTGAAC                        | Mapping                                     |                                      |
| PERLx473                        | PERLx473_F<br>PERLx473_R                                                       | AAGGTTGAGGTAAGTGTGAAAGCAA<br>CGTATTCCGAGAAGTCCAGATCA                     | Mapping                                     |                                      |
| dCAPS2.8<br>8                   | 407/DCAPS 2.88 F<br>408/DCPAS 2.88 R                                           | GCGATACACCACAGTGAAGAAGAGATCTT<br>GATGCAATGAACAAGAATCGTTTGA               | Mapping                                     |                                      |
| ibid9                           | ibid9_F<br>ibid9_R                                                             | GAGAAAATTACTTTACTTAAATTACGCA<br>ACAGGTAATTGTGGATTATGAAGGA                | Mapping                                     |                                      |
| PERLx779                        | 203/PERLx779 F<br>204/PERLx779 R                                               | TCCAAGAGTAATGGTAGACTAGAG<br>GCTCTTTGATTGCATTTGAGG                        | Mapping                                     |                                      |
| ibid7                           | 195/ibid7 F<br>196/ibid7 R                                                     | CATTTACATTACAAGTACTGGTGT<br>ACAGGCAGGGTGTGACC                            | Mapping                                     |                                      |
| AtMu1<br>unspliced<br>(a, b, c) | 45/Mu1<br>134/Mu1 intron1 F                                                    | GCTCTTGCTTTGGTGATGGT<br>GGTATGTAACGAAGTTCTCATTATG                        | RT-PCR                                      |                                      |
| AtMu1<br>spliced<br>(a,b,c)     | 44/Mu1<br>45/Mu1                                                               | CCGAGAAGTGGTGTGGTTT<br>GCTCTTGCTTTGGTGATGGT                              | RT-PCR                                      | (Singer et al.,<br>2001)             |
| AtMu1a,b,c                      | 496/Mu discri F<br>497/ Mu discri R                                            | TAGTTGCTCACCTAATGGGAAATGT<br>GGCATTGTGGGATTGTAGACAC                      | AtMu1 transcript<br>discrimination<br>assay |                                      |
| AtMu1c                          | 1006/PyroMark_F1<br>1007/PyroMark_R1<br>1008/PyroMark_S1                       | Biotin-GACAGCCACCATGCCATTAA<br>GCGACTCATTCTCCCTTTGATC<br>GGTGCGGTTACCAAG | Pyrosequencing                              |                                      |
| AtMu1c                          | 1249/Bisulf_Mu5g_<br>TIR_BottomStrand<br>1319/Bisulf_Mu5g_<br>TIR_TopStrand_II | ATAAAAAAATCRAACCCTCCTTACCAAAC<br>GGGTTGTTTGCTTYTGTATTYYTGAA              | Bisulfite<br>sequencing                     |                                      |
| AtMu1c                          | 720/Mu5g left F<br>721/Mu5g left R                                             | GTGATCAAGACATCATGTACGCAT<br>CATTGTGGGATTGTAGACACCAA                      | Methylation<br>assay, ChIP                  | Fig. 3: left                         |
| AtMu1c                          | 943/Mu5g middle F<br>944/Mu5g middle R                                         | TCAAGAAGAATCATGCCAAGAA<br>GCGGTTCCCTCTTCAATACATC                         | Methylation<br>assay, ChIP                  | Fig. 3: middle                       |
| AtMu1c                          | 722/Mu5g right F<br>723/Mu5g right R                                           | GAAGAATGAGTCGCCAAAA<br>TCTCTTCTCGGGACCTTCTCC                             | Methylation<br>assay, ChIP                  | Fig. 3: right                        |
| AtMu1c                          | 1067/Mu5g TIR F<br>1068/Mu5g TIR R                                             | TGGTTGGTCAATGGTTTAAATAGC<br>CTGCCTCTGTACCCTGAAATA                        | Methylation<br>assay, ChIP                  | Fig. 3D: TIR, Fig.<br>3: Primer 5, 6 |
| ESL1                            | 1161/ESL1_F<br>1162/ESL1_R                                                     | GAAACTAAAGGAAGAACATTGGA<br>CCCTATCACTATCCGTATCTGAAA                      | PCR                                         | Fig. 3: Primer 1,<br>2               |
| AtMu1c                          | 1085/AtMu1.5g_F<br>1086/AtMu1.5g_R                                             | CGGCTAAACCTGTAGTGT<br>AATAACAGTGGATTTAAGGTGA                             | PCR                                         | Fig. 3: Primer 3,<br>4               |
| TUB6                            | 161/TUB6 RT F<br>160/TUB6 RT R                                                 | GGTGAAGGAATGGACGAGAT<br>GTCATCTGCAGTTGCGTCTT                             | qPCR                                        |                                      |
| AtMu1a,b,c                      | 459/Muq3 R<br>460/Muq3 F                                                       | TTTTACATCGTAATGCGTTATGCC<br>GAAGAATGAGTCGCCAAGAAGAA                      | qPCR                                        |                                      |
| ESL1                            | 1163/ESL1-F-qRT<br>1164/ESL1-R-qRT                                             | CGATGTCGGAGAAGTCAAGA<br>GCAGTGATACGACATTCTGGT                            | RT-PCR                                      | (Yamada et al.,<br>2010)             |
| At1g77525                       | 1556/Qar8a_qPCR<br>_F<br>1557/Qar8a_qPCR<br>_R                                 | GAAATCTGTTAGTGCGTGTGTGG<br>CACTGTTGAGGACCCCGAG                           | RT-PCR                                      |                                      |



|                    |                                                          |                                               |     |  |
|--------------------|----------------------------------------------------------|-----------------------------------------------|-----|--|
| Chr. 1:<br>29.1 Mb | 1494/Qar-8a_Mu_F<br>1495/Qar-8a_Mu_R                     | GATATTTTCCTGCGTGGTT<br>GTGTGTGGTTCTTTGTGTTCTC | PCR |  |
| Chr. 2: 6.0 Mb     | 1496/MADS_Box_I<br>ntron_F<br>1497/MADS_Box_I<br>ntron_R | GTGTAGACTTCCGTGCAGGT<br>ACGATTTTTCATTTTGTAGCA | PCR |  |
| Chr. 5:<br>21.4 Mb | 1498/Chi-0_Mu_F<br>1499/Chi-0_Mu_R                       | GAGGAGTGGAGCATGGAAG<br>ATGACAATTGCGTGGAAGTAG  | PCR |  |

### Supplemental References

- Singer, T., Yordan, C., and Martienssen, R.A.** (2001). Robertson's Mutator transposons in *A. thaliana* are regulated by the chromatin-remodeling gene Decrease in DNA Methylation (DDM1). *Genes Dev* **15**, 591-602.
- Yamada, K., Osakabe, Y., Mizoi, J., Nakashima, K., Fujita, Y., Shinozaki, K., and Yamaguchi-Shinozaki, K.** (2010). Functional analysis of an *Arabidopsis thaliana* abiotic stress-inducible facilitated diffusion transporter for monosaccharides. *J Biol Chem* **285**, 1138-1146.
